# Supplementary material
Source: PubMed Central journal article supplement (PMC3841722)
Supplement: NIHMS527583-supplement-supplement_package.pdf [file NIHMS527583-supplement-supplement_package.pdf]

1 **Supporting Information**

2

3 NaxD is a deacetylase required for lipid A modification and *Francisella* pathogenesis.

4

5 Anna C. Llewellyn<sup>1,2</sup>, Jinshi Zhao<sup>3</sup>, Feng Song<sup>3</sup>, Jyothi Parvathareddy<sup>4</sup>, Qian Xu<sup>5</sup>, Brooke A.

6 Napier<sup>1,2</sup>, Hamed Laroui<sup>6</sup>, Didier Merlin<sup>6,7</sup>, James E. Bina<sup>8</sup>, Peggy A. Cotter<sup>5</sup>, Mark A. Miller<sup>4</sup>,

7 Christian R. H. Raetz<sup>3</sup>, David S. Weiss<sup>2,9,\*</sup>.

8

9 <sup>1</sup>Department of Microbiology and Immunology, Microbiology and Molecular Genetics Program;

10 <sup>2</sup>Emory Vaccine Center, Emory University, Atlanta, Georgia, <sup>3</sup>Department of Biochemistry,

11 Duke University Medical Center, Durham, North Carolina, <sup>4</sup>Department of Microbiology,

12 Immunology, and Biochemistry, The University of Tennessee Health Science Center, Memphis,

13 Tennessee, <sup>5</sup>Department of Microbiology and Immunology, School of Medicine, University of

14 North Carolina at Chapel Hill, Chapel Hill, North Carolina, <sup>6</sup>Department of Biology, Center for

15 Diagnostics and Therapeutics, Georgia State University, Atlanta, Georgia, <sup>7</sup>Veterans Affairs

16 Medical Center, Decatur, Georgia, <sup>8</sup>Department of Microbiology and Molecular Genetics,

17 University of Pittsburgh School of Medicine, Pittsburgh, Pennsylvania, <sup>9</sup>Division of Infectious

18 Diseases, Department of Medicine, Emory University, Atlanta, Georgia.

19

## 20 **Supporting Information Experimental Procedures**

21 ***F. tularensis* transformation.** An overnight mMHB broth culture of SchuS4 was used to  
22 inoculate 50 ml of mMHB broth. The resulting culture was then incubated with shaking at 37°C  
23 until the culture reached  $OD_{600} = 0.3$  before the culture was transferred to a 50 ml conical tube  
24 and the cells were collected by centrifugation at 4°C. The cell pellet was resuspended in 4 ml of  
25 0.5 M sucrose that was pre-chilled to 4°C, equally distributed into two 2 ml screw-capped vials,  
26 before the cells were again collected by centrifugation at 4°C. The resulting cells were then  
27 washed three additional times with 2 ml of pre-chilled 0.5 M sucrose. Following the final wash,  
28 the cell pellet was resuspended to a total volume of 70  $\mu$ l 0.5 M sucrose and placed on ice. One  
29 microgram of purified p $\Delta$ FTT0453 was added to 70  $\mu$ l of the electrocompetent SchuS4 cells and  
30 the mixture was transferred to a pre-chilled 0.1 cm electroporation cuvette (BTX, Holliston,  
31 MA). This mixture was then electroporated at 1.5 kV, 25  $\mu$ F, and 200 ohms. Next, 1 ml of mMHB  
32 broth was immediately added to the cuvette and then this cell suspension was transferred to a 50  
33 ml conical tube. An additional 1 ml of mMHB broth was added to the electroporated cell  
34 suspension and the cells were incubated with shaking at 37°C. After two hours incubation the  
35 cells were collected by centrifugation, resuspended in 500  $\mu$ l of mMHB broth and spread onto BHI  
36 agar plates containing 10  $\mu$ g ml<sup>-1</sup> kanamycin. Following three days incubation at 37°C, several  
37 kanamycin resistant colonies were then patched onto fresh BHI agar plates. Among the resulting  
38 clones, four colonies were selected and used to inoculate 1 ml of mMHB broth without antibiotics.  
39 These broth cultures were incubated with shaking at 37°C until early log phase ( $OD_{600} = 0.4$ )  
40 and then aliquots of the culture were spread onto CHA-5% sucrose plates. When colonies  
41 appeared on the sucrose plates (4-5 days later), 24 sucrose resistant colonies were then patched  
42 onto fresh CHA sucrose plates and the plates incubated at 37°C until colonies were visible. The  
43 resulting colonies were then replica-plated onto BHI agar plates with or without kanamycin.  
44 Kanamycin sensitive clones were subsequently assayed for the presence of the *naxD* deletion.

45 ***F. novicida* growth curves.** *F. novicida* overnight cultures were grown at 37°C on a rolling  
46 drum in tryptic soy broth (TSB; Difco/BD, Sparks, MD) supplemented with 0.02% L-cysteine  
47 (Sigma-Aldrich, St. Louis, MO) and then subcultured in 96 well plates to OD<sub>600</sub> = 0.03 in either  
48 TSB with 0.02% cysteine or Chamberlain's chemically defined minimal medium, prepared as  
49 previously described (Chamberlain, 1965). OD<sub>600</sub> was measured hourly using a BioTek Synergy  
50 Mx (Winooski, VT) microplate reader.

51 **Macrophage staining and immunofluorescence.** To measure phagosomal escape, primary  
52 murine BMM were infected and stained as previously described (Weiss *et al.*, 2007, Jones *et al.*,  
53 2011). Briefly, prechilled macrophages were infected at 4°C, rapidly warmed for 5 min in a 37°C  
54 water bath, and then incubated for 10 min at 37°C, 5% CO<sub>2</sub>. At 30, 60, or 120 min after  
55 infection, cells were fixed with 4% paraformaldehyde and then permeabilized and stained with a  
56 rat monoclonal anti-LAMP-1 antibody (1D4B) (Developmental Studies Hybridoma Bank,  
57 University of Iowa, Iowa City, IA) and chicken anti-*F. novicida* antibody (generous gift from Dr.  
58 Denise Monack, Stanford University, Stanford, CA) in PBS with 1% saponin and 3% BSA.  
59 Next, cells were respectively incubated with Alexa488 (anti-rat) and Alexa594 (anti-chicken)  
60 secondary antibodies. The coverslips were then mounted over SlowFade Gold antifade reagent  
61 containing DAPI. Images were obtained using a Zeiss Axioscope Z.1 microscope equipped with  
62 a Zeiss Imager 2.1 camera, and images were taken at 63x magnification.

63 **Western blot.** For *F. novicida*, protein concentrations were normalized to colony forming units  
64 of initial cultures and amounts equaling 1 x 10<sup>8</sup> bacteria from each fraction were run on protein  
65 gels (Bio-Rad, Hercules, CA) along with a broad range protein standard (Bio-Rad) for 35  
66 minutes at 200 volts using a Bio-Rad PowerPac HC. Next, the proteins were transferred onto  
67 nitrocellulose membranes (GE Osmonics, Trevose, PA) for 30 minutes at 100 volts. Western  
68 blots were then performed. Briefly, at room temperature, membranes were blocked 2 hours using  
69 5% skim milk tris-buffered saline with 0.005% Tween-20 (TBST). Next, membranes were

70 incubated for 2 hours with primary antibodies diluted in 5% skim milk TBST against His-tag  
71 (Abgent, San Diego, CA), FopA (generous gift from Dr. Michael Norgard, University of Texas  
72 Southwestern Medical Center, Dallas, TX)(Huntley *et al.*, 2010), or IglA (BEI Resources,  
73 Manassas, VA)(de Bruin *et al.*, 2007). The membranes were then incubated with secondary  
74 antibodies against IgG from mouse (Cell Signaling, Danvers, MA), rat (Cell Signaling), or rabbit  
75 (Cell Signaling). Finally, membranes were developed using SuperSignal (Bio-Rad) and imaged  
76 using a UVP BioSpectrum 600 (Upland, CA). UVP Vision Work CS Image Acquisition and  
77 Analysis Software 6.7.2 was used to merge white light and fluorescent images.

78

### 79 **Supporting Information References**

80 Chamberlain, R.E. (1965) Evaluation of Live Tularemia Vaccine Prepared in a Chemically

81 Defined Medium. *Appl Microbiol* **13**: 232-235.

82 de Bruin, O.M., Ludu, J.S., and Nano, F.E. (2007) The *Francisella* pathogenicity island protein

83 IglA localizes to the bacterial cytoplasm and is needed for intracellular growth. *BMC*

84 *Microbiol* **7**: 1.

85 Huntley, J.F., Robertson, G.T., and Norgard, M.V. (2010) Method for the isolation of

86 *Francisella tularensis* outer membranes. *J Vis Exp*.

87 Jones, C.L., and Weiss, D.S. (2011) TLR2 signaling contributes to rapid inflammasome

88 activation during *F. novicida* infection. *PLoS One* **6**: e20609.

89 Weiss, D.S., Brotcke, A., Henry, T., Margolis, J.J., Chan, K., and Monack, D.M. (2007) *In vivo*

90 negative selection screen identifies genes required for *Francisella* virulence. *Proc Natl*

91 *Acad Sci U S A* **104**: 6037-6042.

92

### 93 **Supporting Information Figure Legends**

94 **Figure S1. The *naxD* deletion mutant exhibits wild-type growth kinetics in both rich and**  
95 **minimal media.** Wild-type (WT, black) and *naxD* deletion mutant strains ( $\Delta$ *naxD*, red) were  
96 grown in either (A) rich media (tryptic soy broth) or (B) minimal media (Chamberlain's broth)  
97 and the OD<sub>600</sub> was measured hourly for 16 hours.

98

99 **Figure S2. NaxD is not required for phagosomal escape.** Fluorescence microscopy imaging  
100 was used to quantify the escape of wild-type *F. novicida* (WT) and *naxD* deletion mutant  
101 ( $\Delta$ *naxD*) bacteria. Primary murine BMM were infected at 100:1 MOI and fixed with 4%  
102 paraformaldehyde at 30, 60, and 120 minutes post-infection. After sample staining and  
103 preparation, bacteria within phagosomes were identified by colocalization of LAMP-1 and *F.*  
104 *novicida*. The percentage of bacteria that escaped from the phagosome was determined by  
105 counting a minimum of 200 bacteria per strain from three different experiments. Bars represent  
106 the average and error bars represent the standard deviation.

107

108 **Figure S3. NaxD is required for *F. tularensis* proliferation within murine BMM.** Primary  
109 murine bone marrow-derived macrophages (BMM) were infected with a 20:1 MOI of wild-type  
110 *F. tularensis* (WT) or the *naxD* deletion strain ( $\Delta$ *naxD*). CFU from lysates 30 minutes post-  
111 infection were compared to those from 24 hours post-infection to determine fold intracellular  
112 replication (n=3 biological replicates). Bars represent the average and error bars represent the  
113 standard deviation. Asterisks indicate significance as compared to wild-type. (\*) = P < 0.05.

114

115 **Figure S4. NaxD localizes to the membrane fraction.** Western blot analysis of whole cell  
116 lysates, soluble fractions, and membrane fractions of wild-type *F. novicida* (WT) and a wild-type  
117 strain in which NaxD was tagged with an 8x His tag (HIS).  $\alpha$ His,  $\alpha$ IgIA (a cytosolic protein), or  
118  $\alpha$ FopA (a membrane protein) antibodies were used with the appropriate secondary antibodies.

119

120 **Figure S5. Exogenously expressed NaxD localizes to the membrane fraction in *E. coli*.**

121 Coomassie stain was used to analyze whole cell lysate (WCL), membrane (Mem) or soluble

122 (Sol) protein fractions from *E. coli* transformed with either the vector control pET-21a or pET-

123 21a encoding *naxD*, with or without IPTG induction.

Figure S1

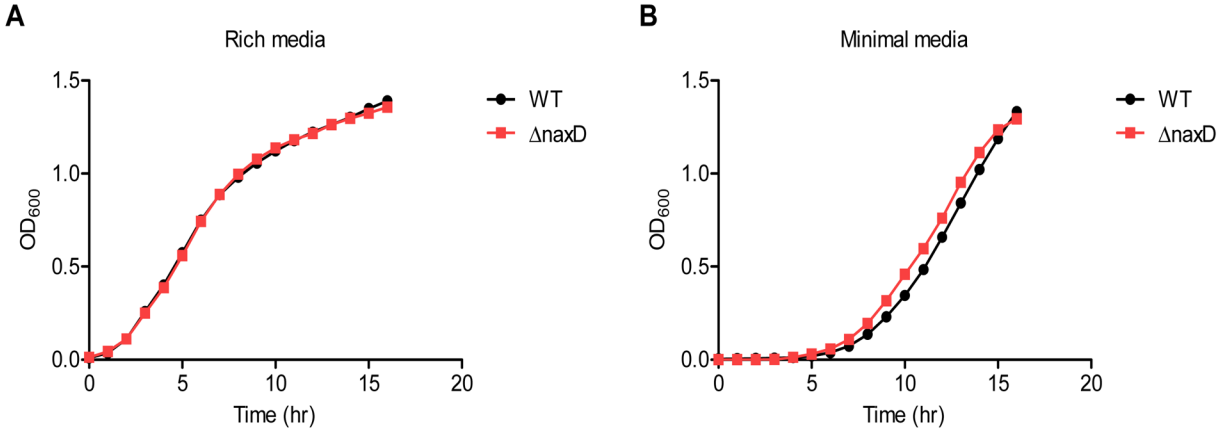

Figure S2

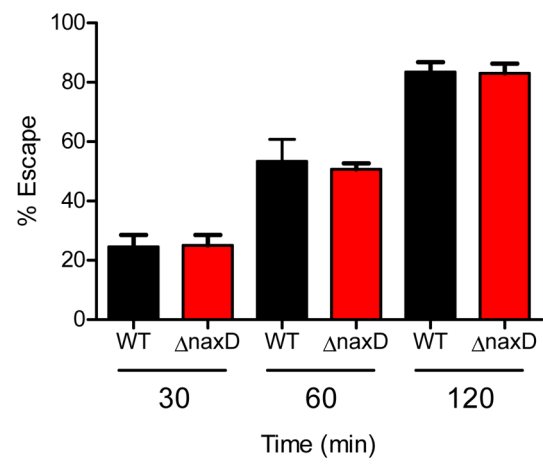



Figure S3

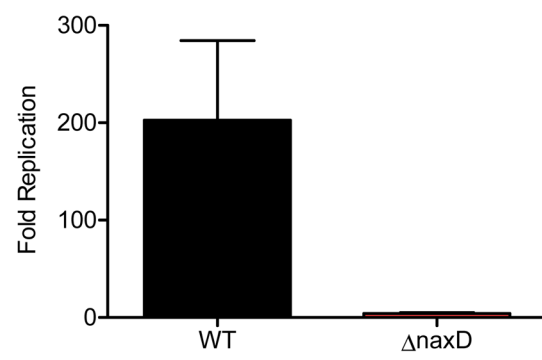

Figure S4

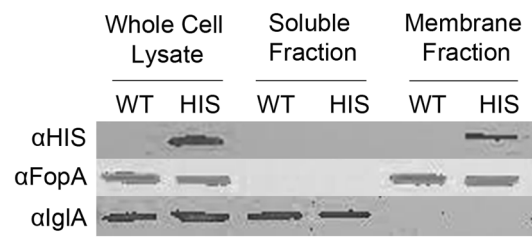

Figure S5

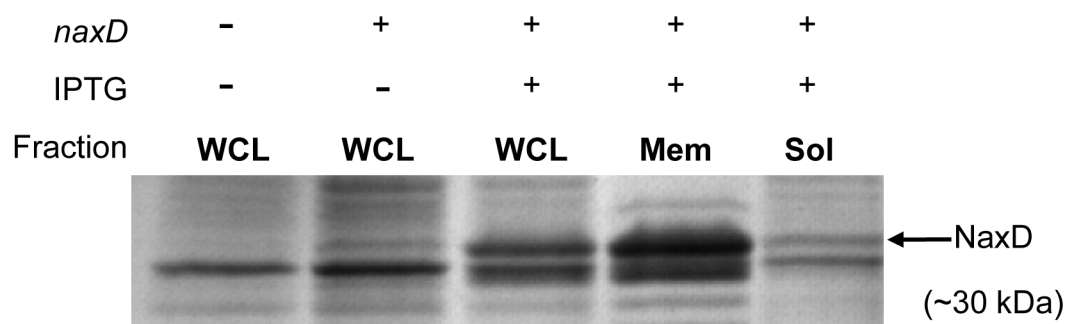

**Table S1. Primers used in this study.**

| Primer/Plasmid name                    | Sequence/Specifications                                                                                                                      |
|----------------------------------------|----------------------------------------------------------------------------------------------------------------------------------------------|
| <b><i>F. novicida</i> FTN_0544</b>     |                                                                                                                                              |
| FTN_0544 deletion check F1             | atctgcaacctcaaatggta                                                                                                                         |
| FTN_0544 Arm 1 FWD                     | gtcctctgataaacgacta                                                                                                                          |
| FTN_0544 Arm 1 REV                     | ttatcgataccgtcgacctcaacttttattgctaattgaatta                                                                                                  |
| FTN_0544 frt_sKAN_frt FWD              | taattcaattagcaaataaaagttgaggtcgacggatcgataa                                                                                                  |
| FTN_0544 frt_sKAN_frt REV              | ttataagaaagtaaataagcagttatgcatagctgcaggatcga                                                                                                 |
| FTN_0544 Arm 2 FWD                     | tcgatcctgcagctatgcataactgctatcttactttctataa                                                                                                  |
| FTN_0544 Arm 2 REV                     | aacaaagtacgttggtatgg                                                                                                                         |
| FTN_0544 deletion check R1             | gggatgtatcgcaatattgt                                                                                                                         |
| FTN_0544 comp Arm 1 REV                | tgagtgacaacccaaagagatttatagtacaatattatgatctt                                                                                                 |
| FTN_0544 comp sKAN FWD                 | aagatcataatattgtactataaatctctttgggtgtcactca                                                                                                  |
| FTN_0544 comp sKAN REV                 | taagaaagtaaataagcagttataacaaccaattaaccaattctg                                                                                                |
| FTN_0544 comp Arm 2 FWD                | cagaattggtaattgggtgtataactgctatcttactttctta                                                                                                  |
| FTN_0544 comp check R2                 | tggtcatcaacatgttcate                                                                                                                         |
|                                        |                                                                                                                                              |
| <b><i>F. tularensis</i> FTT_0453</b>   |                                                                                                                                              |
| pXB186                                 | Kanamycin resistance cassette ( <i>aph</i> ), sucrose sensitivity cassette ( <i>sacB</i> )                                                   |
| FTT0453c checkF1                       | aaaggtactaatgttggagc                                                                                                                         |
| FTT0453c checkF2                       | tatccaagttgcagaattgg                                                                                                                         |
| FTT0453c Arm 1 FWD                     | atatatatggatccttattattgggtggtgtagc                                                                                                           |
| FTT0453c Arm 1 REV                     | aggtgataattcaattagcaaaataactgctatcttactttct                                                                                                  |
| FTT0453c Arm 2 FWD                     | agaaagtaaaatagcagttatcttcttaattgaattatcacct                                                                                                  |
| FTT0453c Arm 2 REV                     | atatatatggatccaaatgttgtgctcagtggtg                                                                                                           |
| FTT0453c checkR1                       | tattattatcttcacgccag                                                                                                                         |
| FTT0453c checkR2                       | acagatatcaatctaagcgg                                                                                                                         |
|                                        |                                                                                                                                              |
| <b><i>B. bronchiseptica</i> BB4267</b> |                                                                                                                                              |
| pSS4245                                | Allelic exchange plasmid for <i>Bordetella</i> species. Tetracycline, streptomycin, ampicillin, bleomycin and kanamycin resistance cassettes |
| pXQ026                                 | pSS4245 containing <i>bb4267</i> deletion fragment (used to generate strain RBXQ24)                                                          |
| pXQ042                                 | pUC18-Mini-TN7 containing <i>bb4267</i> complement fragment [used to generate strain RBXQ27 (RBXQ24/pXQ042)]                                 |
| 4267F1                                 | aagatgcctggccgacttc                                                                                                                          |
| 4267R1                                 | ctggcagccgtttatgagt                                                                                                                          |
| LK-4267F2                              | taaacggcttgccagtcgttactggtcatttcag                                                                                                           |
| 4267R2                                 | cctgcatacctatccggttcg                                                                                                                        |
| pUC18-Mini-TN7                         | ampicillin and kanamycin resistance cassettes                                                                                                |
| pTNS3                                  | Helper plasmid for pUC18-Mini-TN7 vectors, ampicillin resistance cassette.                                                                   |
|                                        |                                                                                                                                              |
| <b><i>E. coli</i></b>                  |                                                                                                                                              |
| pET-21a                                | Empty expression vector plasmid                                                                                                              |
| pET-21a- <i>FTN_0544</i>               | pET-21a encoding <i>FTN_0544</i>                                                                                                             |
